# Supplementary material for: A new name for an old problem—Colletotrichum cigarro is the cause of St John’s wilt of Hypericum perforatum
Source: Front Fungal Biol. 2025 Jan 23;5:1534080. doi: 10.3389/ffunb.2024.1534080 (PMC11799269; doi:10.3389/ffunb.2024.1534080)
Supplement: Supplementary file 5 [file Table1.xlsx]

## Sheet: Tabelle1
Species	Species Complex	Accession No.	Host	Year of isolation	Country	GenBank accession number				Reference
						ITS	GAPDH	ACT	GS	ITS	GAPDH	ACT	GS
C. "acutatum" - C. cf. fioriniae	C. acutatum	TC2-027	Hypericum perforatum	2010	Canada	KC916691	-	-	-	Ellsworth et al., 2013	-	-	-
C. "acutatum" - C. cf. lupini	C. acutatum	710	Hypericum perforatum	-	Czech Republic	JX876548	JX876552	-	-	Staňková et al., 2014	Staňková et al., 2014	-	-
C. aenigma	C. gloeosporioides	ICMP 18608*	Persea americana	2010	Israel	JX010244	JX010044	JX009443	JX010078	Weir et al., 2012	Weir et al., 2012	Weir et al., 2012	Weir et al., 2012
C. aeschynomenes	C. gloeosporioides	ICMP 17673*, ATCC 201874	Aeschynomene virginica	2008	USA	JX010176	JX009930	JX009483	JX010081	Weir et al., 2012	Weir et al., 2012	Weir et al., 2012	Weir et al., 2012
C. alatae	C. gloeosporioides	CBS 304.67*, ICMP 17919	Dioscorea alata	1959	India	JX010190	JX009990	JX009471	JX010065	Weir et al., 2012	Weir et al., 2012	Weir et al., 2012	Weir et al., 2012
C. alienum	C. gloeosporioides	ICMP 12071*	Malus domestica	1987	New Zealand	JX010251	JX010028	JX009572	JX010101	Weir et al., 2012	Weir et al., 2012	Weir et al., 2012	Weir et al., 2012
C. aotearoa	C. gloeosporioides	ICMP 18537*	Coprosma sp.	2009	New Zealand	JX010205	JX010005	JX009564	JX010113	Weir et al., 2012	Weir et al., 2012	Weir et al., 2012	Weir et al., 2012
C. arecicola	C. gloeosporioides	CGMCC 3.19667*	Areca catechu	-	China	MK914635	MK935455	MK935374	-	Cao et al., 2020	Cao et al., 2020	Cao et al., 2020	-
C. asianum	C. gloeosporioides	ICMP 18580*, CBS 130418	Coffea arabica	2008	Thailand	FJ972612	JX010053	JX009584	JX010096	Prihastuti et al., 2009	Weir et al., 2012	Weir et al., 2012	Weir et al., 2012
C. camelliae	C. gloeosporioides	LC1364, CGMCC 3.14925*	Camellia sinensis	2010	China	KJ955081	KJ954782	KJ954363	KJ954932	Liu et al., 2015	Liu et al., 2015	Liu et al., 2015	Liu et al., 2015
C. chiangmaiense	C. gloeosporioides	MFLUCC 18-0945*	Magnolia garrettii	2017	Thailand	MW346499	MW548592	MW655578	-	Silva, 2021	Silva, 2021	Silva, 2021	-
C. cigarro	C. gloeosporioides	IMI 359911, ICMP 17931, CBS 12988	Dryas octopetala	1993	Switzerland	JX010236	JX009965	JX009475	JX010121	Weir et al., 2012	Weir et al., 2012	Weir et al., 2012	Weir et al., 2012
C. cigarro	C. gloeosporioides	JKI-EP-70790	Hypericum perforatum	-	Germany	PP691682	PP737583	PP737572	PP737562	This study	This study	This study	This study
C. cigarro	C. gloeosporioides	JKI-EP-71555	Hypericum perforatum	2000	Germany	PP691683	PP737584	PP737573	PP737563	This study	This study	This study	This study
C. cigarro	C. gloeosporioides	JKI-GP-23-031, C43-H252	Hypericum perforatum	2021	Germany	PP691688	PP737589	PP737578	PP737566	This study	This study	This study	This study
C. cigarro	C. gloeosporioides	DSM 116564, JKI-GP-23-020, C43-H254	Hypericum perforatum	2021	Germany	PP691689	PP737590	PP737579	PP737567	This study	This study	This study	This study
C. cigarro	C. gloeosporioides	DSM 116563, JKI-GF-Z1952	Hypericum perforatum	1999	Germany	PP691681	PP737582	PP737571	PP737561	This study	This study	This study	This study
C. cigarro	C. gloeosporioides	JKI-GP-23-030, C43-H212	Hypericum perforatum	2021	Switzerland	PP691686	PP737587	PP737576	PP737564	This study	This study	This study	This study
C. cigarro	C. gloeosporioides	DSM 117132, JKI-GP-23-019, C43-H213	Hypericum perforatum	2021	Switzerland	PP691687	PP737588	PP737577	PP737565	This study	This study	This study	This study
C. cigarro	C. gloeosporioides	JKI-GP-24-010, C43-H286	Hypericum perforatum	2022	Germany	PQ484106	PQ595031	PQ595026	PQ595036	This study	This study	This study	This study
C. cigarro	C. gloeosporioides	JKI-GP-24-011, C43-H293	Hypericum perforatum	2022	Germany	PQ484107	PQ595032	PQ595027	PQ595037	This study	This study	This study	This study
C. cigarro	C. gloeosporioides	JKI-GP-24-012, C43-H328	Hypericum perforatum	2022	Germany	PQ484108	PQ595033	PQ595028	PQ595038	This study	This study	This study	This study
C. cigarro	C. gloeosporioides	JKI-GP-24-013, C43-H329	Hypericum perforatum	2022	Germany	PQ484109	PQ595034	PQ595029	PQ595039	This study	This study	This study	This study
C. cigarro	C. gloeosporioides	JKI-GP-24-014, C43-H338	Hypericum perforatum	2022	Germany	PQ484110	PQ595035	PQ595030	PQ595040	This study	This study	This study	This study
C. cigarro	C. gloeosporioides	ICMP 18534	Kunzea ericoides	-	New Zealand	JX010227	JX009904	JX009473	JX010116	Weir et al., 2012	Weir et al., 2012	Weir et al., 2012	Weir et al., 2012
C. cigarro	C. gloeosporioides	ICMP 18539*	Olea europaea	2008	Australia	JX010230	JX009966	JX009523	JX010132	Weir et al., 2012	Weir et al., 2012	Weir et al., 2012	Weir et al., 2012
C. cigarro	C. gloeosporioides	ICMP 12952	Persea americana	-	New Zealand	JX010214	JX009648	JX009431	JX010126	Weir et al., 2012	Weir et al., 2012	Weir et al., 2012	Weir et al., 2012
C. cigarro	C. gloeosporioides	CBS 237.49(*), ICMP 17922	Hypericum perforatum	1937	Germany	JX010238	JX010042	JX009450	JX010120	Weir et al., 2012	Weir et al., 2012	Weir et al., 2012	Weir et al., 2012
C. cigarro	C. gloeosporioides	CBS 124.22(*), ICMP 19122	Vaccinium sp.	1922	USA	JX010228	JX009950	JX009536	JX010134	Weir et al., 2012	Weir et al., 2012	Weir et al., 2012	Weir et al., 2012
C. clidemiae	C. gloeosporioides	ICMP 18658*	Clidemia hirta	2010	USA, Hawaii	JX010265	JX009989	JX009537	JX010129	Weir et al., 2012	Weir et al., 2012	Weir et al., 2012	Weir et al., 2012
C. cobbittiense	C. gloeosporioides	BRIP 66219*	Cordyline hybrid	2016	Australia	MH087016	MH094133	MH094134	-	Crous et al., 2018	Crous et al., 2018	Crous et al., 2018	-
C. cordylinicola	C. gloeosporioides	MFLUCC 090551*, ICMP 18579	Cordyline fruticosa	2009	Thailand	JX010226	JX009975	JX009586	JX010122	Weir et al., 2012	Weir et al., 2012	Weir et al., 2012	Weir et al., 2012
C. dracaenigenum	C. gloeosporioides	MFLUCC 19-0430*	Dracaena fragrans	2017	Thailand	MN921250	MT215577	MT313686	-	Chaiwan et al., 2021	Chaiwan et al., 2021	Chaiwan et al., 2021	-
C. fici-septicae	C. gloeosporioides	MFLU 19-2770	Ficus sp.	2019	Taiwan	MW114367	MW183774	MW151585	-	Tennakoon et al., 2021	Tennakoon et al., 2021	Tennakoon et al., 2021	-
C. fioriniae	C. acutatum	CBS 128517*	Fiorinia externa	2005	USA	JQ948292	JQ948622	JQ949613	EF593353	Damm et al., 2012	Damm et al., 2012	Damm et al., 2012	direct submission
C. fructicola	C. gloeosporioides	ICMP 18581*, CBS 130416	Coffea arabica	2007	Thailand	JX010165	JX010033	JX009501	JX010095	Weir et al., 2012	Weir et al., 2012	Weir et al., 2012	Weir et al., 2012
C. gardeniae	C. gloeosporioides	GUCC 12049	Gardenia jasminoides	2018	China	OP722995	OP737963	OP715801	-	Zhang et al., 2023	Zhang et al., 2023	Zhang et al., 2023	-
C. gloeosporioides	C. gloeosporioides	DSM 62146	Citrus sinensis	-	Greece	PP691691	PP737592	PP737581	PP737569	This study	This study	This study	This study
C. gloeosporioides	C. gloeosporioides	IMI 356878*, ICMP 17821, CBS 112999	Citrus sinensis	1991	Italy	JX010152	JX010056	JX009531	JX010085	Weir et al., 2012	Weir et al., 2012	Weir et al., 2012	Weir et al., 2012
C. gloeosporioides	C. gloeosporioides	DSM 62136	Citrus sp.	-	Italy	PP691690	PP737591	PP737580	PP737568	This study	This study	This study	This study
C. gloeosporioides	C. gloeosporioides	CBS 119204, ICMP 18678	Pueraria lobata	2010	USA	JX010150	JX010013	JX009502	PP737570	Weir et al., 2012	Weir et al., 2012	Weir et al., 2012	This study
C. "gloeosporioides" - C. cf. cigarro	C. gloeosporioides	BBA 70048	Hypericum perforatum	-	Germany	AJ301907	-	-	-	Nirenberg et al., 2002	-	-	-
C. "gloeosporioides" - Colletotrichum sp.	C. gloeosporioides	HYMS26	Hypericum mysorense	2009	India	KC342045	-	-	-	Samaga and Rai, 2016	-	-	-
C. "gloeosporioides" - Colletotrichum sp.	C. gloeosporioides	HYJ10S	Hypericum japonicum	2009	India	KF180161	-	-	-	Samaga and Rai, 2016	-	-	-
C. "gloeosporioides" - Colletotrichum sp.	C. gloeosporioides	HYJ25	Hypericum japonicum	2009	India	KF180162	-	-	-	Samaga and Rai, 2016	-	-	-
C. "gloeosporioides" - Colletotrichum sp.	C. gloeosporioides	HYJ26	Hypericum japonicum	2009	India	KF180163	-	-	-	Samaga and Rai, 2016	-	-	-
C. "gloeosporioides" - Colletotrichum sp.	C. gloeosporioides	HYML53	Hypericum mysorense	2009	India	KF180164	-	-	-	Samaga and Rai, 2016	-	-	-
C. "graminicola" - Colletotrichum sp.	C. graminicola	TC2-028	Hypericum perforatum	2010	Canada	KC916667	-	-	-	Ellsworth et al., 2013	-	-	-
C. helleniense	C. gloeosporioides	CBS 142418*	Citrus reticulata	2015	Greece	KY856446	KY856270	KY856019	-	Guarnaccia et al., 2017	Guarnaccia et al., 2017	Guarnaccia et al., 2017	-
C. henanense	C. gloeosporioides	LF238, LC3266, CGMCC 3.17354*	Camellia sinensis	2012	China	KJ955109	KJ954810	KM023257	KJ954960	Liu et al., 2015	Liu et al., 2015	Liu et al., 2015	Liu et al., 2015
C. horii	C. gloeosporioides	NBRC 7478*, ICMP 10492	Diospyros kaki	1959	Japan	GQ329690	GQ329681	JX009438	JX010137	Weir et al., 2012	Weir et al., 2012	Weir et al., 2012	Weir et al., 2012
C. jiangxiense	C. gloeosporioides	LF687, LC3463, CGMCC 3.17363*	Camellia sinensis	2013	China	KJ955201	KJ954902	KJ954471	KJ955051	Liu et al., 2015	Liu et al., 2015	Liu et al., 2015	Liu et al., 2015
C. kahawae	C. gloeosporioides	CBS 982.69, ICMP 17915	Coffea arabica	1965	Angola	JX010234	JX010040	JX009474	JX010125	Weir et al., 2012	Weir et al., 2012	Weir et al., 2012	Weir et al., 2012
C. kahawae	C. gloeosporioides	IMI 361501, ICMP 17905	Coffea arabica	1994	Cameroon	JX010232	JX010046	JX009561	JX010127	Weir et al., 2012	Weir et al., 2012	Weir et al., 2012	Weir et al., 2012
C. kahawae	C. gloeosporioides	IMI 319418*, ICMP 17816	Coffea arabica	2008	Kenya	JX010231	JX010012	JX009452	JX010130	Weir et al., 2012	Weir et al., 2012	Weir et al., 2012	Weir et al., 2012
C. kahawae	C. gloeosporioides	IMI 301220, ICMP 17811	Coffea arabica	1986	Malawi	JX010233	JX009970	JX009555	JX010131	Weir et al., 2012	Weir et al., 2012	Weir et al., 2012	Weir et al., 2012
C. "kahawae" - Colletotrichum sp.	C. gloeosporioides	XSD2	Hypericum chinensis	2019	China	MW202334	-	-	-	Ding et al., 2023	-	-	-
C. ledongense	C. gloeosporioides	LD1683, CGMCC 3.18888*	Hevea brasiliensis	2016	China	MG242009	MG242017	MG242015	MG242021	Liu et al., 2018	Liu et al., 2018	Liu et al., 2018	Liu et al., 2018
C. musae	C. gloeosporioides	CBS 116870*, ICMP 19119	Musa sp.	2011	USA	JX010146	JX010050	JX009433	JX010103	Weir et al., 2012	Weir et al., 2012	Weir et al., 2012	Weir et al., 2012
C. nupharicola	C. gloeosporioides	CBS 470.96*, ICMP 18187	Nuphar lutea subsp. polysepala	1989	USA	JX010187	JX009972	JX009437	JX010088	Weir et al., 2012	Weir et al., 2012	Weir et al., 2012	Weir et al., 2012
C. psidii	C. gloeosporioides	CBS 145.29*, ICMP 19120	Psidium sp.	1929	Italy	JX010219	JX009967	JX009515	JX010133	Weir et al., 2012	Weir et al., 2012	Weir et al., 2012	Weir et al., 2012
C. queenslandicum	C. gloeosporioides	ICMP 1778*	Carica papaya	1965	Australia	JX010276	JX009934	JX009447	JX010104	Weir et al., 2012	Weir et al., 2012	Weir et al., 2012	Weir et al., 2012
C. rhexiae	C. gloeosporioides	Coll1026, BPI 884112, CBS 133134*	Rhexia virginica	2010	USA	JX145128	MZ664046	MZ664127	-	Doyle et al., 2013	Liu et al., 2022	Liu et al., 2022	-
C. salsolae	C. gloeosporioides	ICMP 19051*	Salsola tragus	1996	Hungary	JX010242	JX009916	JX009562	JX010093	Weir et al., 2012	Weir et al., 2012	Weir et al., 2012	Weir et al., 2012
C. siamense	C. gloeosporioides	ICMP 18578*, CBS 130417	Coffea arabica	2008	Thailand	JX010171	JX009924	FJ907423	JX010094	Weir et al., 2012	Weir et al., 2012	Prihastuti 2009	Weir et al., 2012
C. syzygiicola	C. gloeosporioides	DNCL021, MFLUCC 10-0624*	Syzygium samarangense	2010	Thailand	KF242094	KF242156	KF157801	KF242125	Udayanga et al., 2013	Udayanga et al., 2013	Udayanga et al., 2013	Udayanga et al., 2013
C. theobromicola	C. gloeosporioides	CBS 124945*, ICMP 18649	Theobroma cacao	2008	Panama	JX010294	JX010006	JX009444	JX010139	Weir et al., 2012	Weir et al., 2012	Weir et al., 2012	Weir et al., 2012
C. ti	C. gloeosporioides	ICMP 4832*	Cordyline sp.	1965	New Zealand	JX010269	JX009952	JX009520	JX010123	Weir et al., 2012	Weir et al., 2012	Weir et al., 2012	Weir et al., 2012
C. tomentosae	C. gloeosporioides	WJL-2021a, ZHKUCC 21-0103, CGMCC 3.24128	Citrus grandis cv. “Tomentosa”	2019	China	OL708422	OL855850	OL855870	ON315373	Liu et al., 2023	Liu et al., 2023	Liu et al., 2023	Liu et al., 2023
C. tropicale	C. gloeosporioides	CBS 124949*, ICMP 18653	Theobroma cacao	2010	Panama	JX010264	JX010007	JX009489	JX010097	Weir et al., 2012	Weir et al., 2012	Weir et al., 2012	Weir et al., 2012
C. wuxiense	C. gloeosporioides	JS1A32, CGMCC 3.17894*	Camellia sinensis	2014	China	KU251591	KU252045	KU251672	KU252101	Wang et al., 2016	Wang et al., 2016	Wang et al., 2016	Wang et al., 2016
C. xanthorrhoeae	C. gloeosporioides	BRIP 45094*, ICMP 17903, CBS 127831	Xanthorrhoea preissii	1994	Australia	JX010261	JX009927	JX009478	JX010138	Weir et al., 2012	Weir et al., 2012	Weir et al., 2012	Weir et al., 2012
C. yulongense	C. gloeosporioides	CFCC 50818*	Vaccinium dunalianum var. urophyllum	-	China	MH751507	MK108986	MH777394	MK108988	Wang et al., 2019	Wang et al., 2019	Wang et al., 2019	Wang et al., 2019
*ex-type strains
Cao, X., Xu, X., Che, H., West, J. S., and Luo, D. (2020). Eight Colletotrichum Species, Including a Novel Species, Are Associated With Areca Palm Anthracnose in Hainan, China. Plant Disease 104, 1369–1377. doi: 10.1094/PDIS-10-19-2077-RE
Chaiwan, N., Tibpromma, S., Jayawardena, R. S., Mapook, A., Wanasinghe, D. N., Mortimer, P. E., et al. (2021). Colletotrichum dracaenigenum, a new species on Dracaena fragrans. Phytotaxa 491. doi: 10.11646/phytotaxa.491.2.4
Crous, P. W., Wingfield, M. J., Burgess, T. I., Hardy, G. E. S. J., Gené, J., Guarro, J., et al. (2018). Fungal Planet description sheets: 716-784. Persoonia 40, 240–393. doi: 10.3767/persoonia.2018.40.10
Damm, U., Cannon, P. F., Woudenberg, J. H. C., and Crous, P. W. (2012). The Colletotrichum acutatum species complex. Stud Mycol 73, 37–113. doi: 10.3114/sim0010
Ding, J., Shen, H., Yao, L., Gao, X., Zhang, M., Wang, Z., et al. (2023). First report of anthracnose caused by Colletotrichum kahawae on Hypericum chinensis in China. Plant Disease. doi: 10.1094/PDIS-08-23-1496-PDN
Doyle, V. P., Oudemans, P. V., Rehner, S. A., and Litt, A. (2013). Habitat and host indicate lineage identity in Colletotrichum gloeosporioides s.l. from wild and agricultural landscapes in North America. PLoS ONE 8, e62394. doi: 10.1371/journal.pone.0062394
Ellsworth, K. T., Clark, T. N., Gray, C. A., and Johnson, J. A. (2013). Isolation and bioassay screening of medicinal plant endophytes from eastern Canada. Can J Microbiol 59, 761–765. doi: 10.1139/cjm-2013-0639
Guarnaccia, V., Groenewald, J. Z., Polizzi, G., and Crous, P. W. (2017). High species diversity in Colletotrichum associated with citrus diseases in Europe. Persoonia 39, 32–50. doi: 10.3767/persoonia.2017.39.02
Liu, F., Ma, Z. Y., Hou, L. W., Diao, Y. Z., Wu, W. P., Damm, U., et al. (2022). Updating species diversity of Colletotrichum, with a phylogenomic overview. Stud Mycol 101, 1–56. doi: 10.3114/sim.2022.101.01
Liu, F., Weir, B. S., Damm, U., Crous, P. W., Wang, Y., Liu, B., et al. (2015). Unravelling Colletotrichum species associated with Camellia: employing ApMat and GS loci to resolve species in the C. gloeosporioides complex. Persoonia 35, 63–86. doi: 10.3767/003158515X687597
Liu, J.-W., Manawasinghe, I. S., Liao, X.-N., Mao, J., Dong, Z.-Y., Jayawardena, R. S., et al. (2023). ﻿Endophytic Colletotrichum (Sordariomycetes, Glomerellaceae) species associated with Citrusgrandis cv. "Tomentosa" in China. MycoKeys 95, 163–188. doi: 10.3897/mycokeys.95.87121
Liu, X., Li, B., Cai, J., Zheng, X., Feng, Y., and Huang, G. (2018). Colletotrichum Species Causing Anthracnose of Rubber Trees in China. Sci Rep 8, 10435. doi: 10.1038/s41598-018-28166-7
Nirenberg, H. I., Feiler, U., and Hagedorn, G. (2002). Description of Colletotrichum lupini comb. nov. in modern terms. Mycologia 94, 307–320. doi: 10.1080/15572536.2003.11833238
Prihastuti, H., Cai, L., McKenzie, E. H. C., and Hyde, K. D. (2009). Characterization of Colletotrichum species associated with coffee berries in northern Thailand. Fungal Diversity 39, 89–109.
Samaga, P. V., and Rai, V. R. (2016). Diversity and bioactive potential of endophytic fungi from Nothapodytes foetida, Hypericum mysorense and Hypericum japonicum collected from Western Ghats of India. Ann Microbiol 66, 229–244. doi: 10.1007/s13213-015-1099-9
Silva, N. I. de (2021). Morphomolecular taxonomic studies reveal a high number of endophytic fungi from Magnolia candolli and M. garrettii in China and Thailand. Mycosphere 12, 163–237. doi: 10.5943/mycosphere/12/1/3
Staňková, B., Víchová, J., and Pokorný, R. (2014). Virulence of Colletotrichum acutatum isolates to several host plants. Acta Univ. Agric. Silvic. Mendelianae Brun. 59, 161–170. doi: 10.11118/actaun201159030161
Tennakoon, D. S., Kuo, C.-H., Maharachchikumbura, S. S. N., Thambugala, K. M., Gentekaki, E., Phillips, A. J. L., et al. (2021). Taxonomic and phylogenetic contributions to Celtis formosana, Ficus ampelas, F. septica, Macaranga tanarius and Morus australis leaf litter inhabiting microfungi. Fungal Diversity 108, 1–215. doi: 10.1007/s13225-021-00474-w
Udayanga, D., Manamgoda, D. S., Liu, X., Chukeatirote, E., and Hyde, K. D. (2013). What are the common anthracnose pathogens of tropical fruits? Fungal Diversity 61, 165–179. doi: 10.1007/s13225-013-0257-2
Wang, Q., Liu, X., Ma, H., Shen, X., and Hou, C. (2019). Colletotrichum yulongense sp. nov. and C. rhombiforme isolated as endophytes from Vaccinium dunalianum var. urophyllum in China. Phytotaxa 394, 285. doi: 10.11646/phytotaxa.394.4.6
Wang, Y.-C., Hao, X.-Y., Wang, L., Bin, X., Wang, X.-C., and Yang, Y.-J. (2016). Diverse Colletotrichum species cause anthracnose of tea plants (Camellia sinensis (L.) O. Kuntze) in China. Sci Rep 6, 35287. doi: 10.1038/srep35287
Weir, B. S., Johnston, P. R., and Damm, U. (2012). The Colletotrichum gloeosporioides species complex. Stud Mycol 73, 115–180. doi: 10.3114/sim0011
Zhang, Q., Nizamani, M. M., Feng, Y., Yang, Y. Q., Jayawardena, R. S., Hyde, K. D., et al. (2023). Genome-scale and multi-gene phylogenetic analyses of Colletotrichum spp. host preference and associated with medicinal plants. Mycosphere 14, 1–106. doi: 10.5943/mycosphere/14/si2/1
ITS	5.8S nuclear ribosomal gene with the two flanking internal transcribed spacers
GAPDH	glyceraldehyde-3-phosphate dehydrogenase
ACT	actin
GS	glutamine synthetase
